1 **Seed size and its rate of evolution correlate with species diversification across**  
2 **angiosperms**

3

4 Short title: Seed size and angiosperm diversification

5

6 **J. Igea<sup>1,4</sup>, E. F. Miller<sup>1,2</sup>, A. S. T. Papadopoulos<sup>3</sup>, A. J. Tanentzap<sup>1</sup>**

7

8 *Author affiliations:*

9 <sup>1</sup> Department of Plant Sciences, University of Cambridge, Downing St, Cambridge,

10 CB2 3EA, UK

11 <sup>2</sup> Department of Zoology, University of Cambridge, Downing St, Cambridge, CB2

12 3EJ, UK

13 <sup>3</sup> Jodrell Laboratory, Royal Botanic Gardens, Kew, Richmond, TW9 3AB, UK.

14

15 <sup>4</sup>*Corresponding author:*

16 Dr. Javier Igea

17 Department of Plant Sciences, University of Cambridge, Downing St, Cambridge,

18 CB2 3EA, UK

19 [ji247@cam.ac.uk](mailto:ji247@cam.ac.uk)

20

21

22

23

24 **Abstract**

25

26 Species diversity varies greatly across the different taxonomic groups that comprise  
27 the Tree of Life (ToL). This imbalance is particularly conspicuous within  
28 angiosperms, but is largely unexplained. Seed mass is one trait that may help clarify  
29 why some lineages diversify more than others because it confers adaptation to  
30 different environments, which can subsequently influence speciation and extinction.  
31 The rate at which seed mass changes across the phylogeny may also be linked to  
32 diversification by increasing reproductive isolation and allowing access to novel  
33 ecological niches. However, the magnitude and direction of the association between  
34 seed mass and diversification has not been assessed across the angiosperm phylogeny.  
35 Here, we show that absolute seed size and the rate of change in seed size are both  
36 associated with variation in diversification rates. Based on the largest available  
37 angiosperm phylogenetic tree, we found that smaller-seeded plants had higher rates of  
38 diversification, possibly due to improved colonisation potential. The rate of  
39 phenotypic change in seed size was also strongly positively correlated with speciation  
40 rates, providing rare, large-scale evidence that rapid morphological change is  
41 associated with species divergence. Our study now reveals that variation in  
42 morphological traits and, importantly, the rate at which they evolve can contribute to  
43 explaining the extremely uneven distribution of diversity across the ToL.

44

45

46 **Introduction**

47 Angiosperms are one of the most species-rich clades on Earth and have dominated  
48 terrestrial plant communities since the Late Cretaceous [1]. The astounding diversity

49 of flowering plants is distributed extremely unevenly across the ToL. Each of the five  
50 most species-rich angiosperm families contains >10,000 species while more than 200  
51 families contain <100 species each [2]. An enduring pursuit in evolutionary biology is  
52 to explain this uneven distribution of biodiversity, not only in angiosperms, but also  
53 across the whole ToL [3].

54

55 Biological traits offer one way to explain disparity in species diversification if they  
56 confer adaptation to different environments. Seed mass is one such trait that is  
57 particularly important for angiosperms because it integrates across many  
58 characteristics of an individual's life history strategy [4]. Along with adult plant size,  
59 seed mass affects survival, reproductive lifespan and dispersal [5]. These life history  
60 characteristics contribute to fitness and adaptation, which are the ultimate  
61 determinants of whether lineages diversify or go extinct [6]. In support of this idea,  
62 seed mass has been shown to correlate negatively with diversification in the  
63 Polygoneaceae [7], but this has not been investigated across large taxonomic scales.  
64 As seed mass varies over ten orders of magnitude in angiosperms, from the minute 1  
65  $\mu\text{g}$  seeds of some orchids to the >18 kg seeds of the sea coconut (*Lodoicea*  
66 *maldivica*), this huge variation may coincide with variation in species diversity.  
67 Generalising the direction and magnitude of a link between seed mass and  
68 diversification across taxonomic scales has, however, proved difficult. Some life  
69 history characteristics encapsulated by seed mass are expected to promote speciation  
70 or extinction, while others may simultaneously counteract such effects [8].

71

72 The rate of change in key biological traits, such as seed size, can be as important in  
73 driving macroevolutionary dynamics as the absolute values of the traits themselves

74 [9]. This is because phenotypic divergence may cause reproductive isolation that  
75 results in speciation [10]. Nevertheless, few empirical studies have detected a  
76 correlation between rates of phenotypic evolution and lineage diversification  
77 [9,11,12]. A correlation between the two may be expected where a trait can change  
78 more rapidly in some species than others in response to selective pressures (i.e. high  
79 “evolvability” [13]). This rapid change may enable greater access to new ecological  
80 niches or quicker establishment of reproductive isolation, thereby increasing the rate  
81 of speciation ( $\lambda$ ) [14]. In the case of seed mass, the ability to switch rapidly from  
82 small seeds with high dispersal ability to larger seeds with lower dispersal ability  
83 might promote cycles of rapid colonisation and isolation or permit adaptation to new  
84 dispersal vectors in novel environments. Rapid evolution of new phenotypes may also  
85 allow individuals to escape harsh environmental conditions and competitive  
86 interactions [15], thereby decreasing extinction rates ( $\mu$ ). The net outcome of these  
87 processes on net diversification ( $r = \lambda - \mu$ ) will ultimately depend upon which of these  
88 rates responds more strongly to phenotypic change.

89

90 Here, we show that both seed mass and its phenotypic rate of evolution correlate with  
91 speciation and extinction across the angiosperm ToL. Our approach combined the  
92 most comprehensive phylogenetic timetree available [16] with an unparalleled dataset  
93 of seed mass measurements from over 30,000 angiosperm species [17]. We estimated  
94 rates of speciation, extinction and seed size evolution across the phylogeny using  
95 Bayesian, method-of-moments, and maximum likelihood analyses – each with  
96 different assumptions regarding rate variation through time. We then tested whether  
97 there was any links between rates of diversification and both seed size and its rate of  
98 evolution. Additionally, we examined whether this link was consistent across different

99 methodologies, timescales and taxonomic categories.

100

## 101 **Results**

102 Our results point to a strong association between angiosperm diversification and rates  
103 of seed size evolution irrespective of analytical method or taxonomic scale, with  
104 weaker evidence for a link between macroevolutionary dynamics and absolute seed  
105 size. In the first instance, we calculated rates of speciation ( $\lambda$ ), extinction ( $\mu$ ) and seed  
106 size evolution using Bayesian Analysis of Macroevolutionary Mixtures (BAMM)  
107 [18]. BAMM models rate heterogeneity through time and lineages, and accounts for  
108 incomplete taxon sampling. We used a genus-level phylogenetic tree for this  
109 particular analysis to maximise overlap between the phylogenetic and the seed mass  
110 datasets and make computation feasible. The resulting tree contained 4105 genera. As  
111 expected, given the high degree of taxonomic imbalance observed in the angiosperm  
112 phylogeny, we found strong support for more than 100 shifts in the rates of  
113 diversification (Fig. S1). There was also marked heterogeneity in the rates of seed size  
114 evolution (Fig. 1), which varied over two orders of magnitude (Fig. S2).

115

116 We then estimated whether shifts in macroevolutionary dynamics ( $\lambda$ ,  $\mu$  and  $r$ )  
117 estimated with BAMM were significantly correlated with absolute mean genus seed  
118 size and rates of seed size evolution by comparing the empirical correlations to a null  
119 distribution generated using STructured Rate Permutations on Phylogenies  
120 (STRAPP), which is robust to phylogenetic pseudoreplication (see Methods for  
121 details) [19]. We were able to link major differences in diversity across angiosperm  
122 clades with both the rate of phenotypic evolution and the absolute value of trait itself.  
123 Specifically, increased speciation was associated with a faster rate of seed size

124 evolution (Spearman's  $\rho = 0.44$ , p-value < 0.0001; Fig. 2a). Increased extinction rates  
125 were similarly associated with higher evolvability ( $\rho = 0.35$ , p-value = 0.003), but  
126 given the weaker effect, the net outcome of  $\lambda - \mu$  was that diversification rates were  
127 positively correlated with phenotypic change ( $\rho = 0.42$ , p-value < 0.0001; Fig. 2b).  
128 We also identified an association between seed size and both speciation and extinction  
129 ( $\rho = -0.22$ , p-value = 0.016 and  $\rho = -0.20$ , p-value = 0.045, respectively; Fig. 2b).  
130 Again, as the effect on speciation was greater than that on extinction, diversification  
131 rates increased with decreasing seed size ( $\rho = -0.19$ , p-value = 0.049; Fig. 2b).  
132 Generally, the observed correlations arose from many phenotypically fast-evolving  
133 clades distributed across the phylogeny (Fig. S2) and were robust to prior choice in  
134 the BAMM analyses (Fig. S1).

135

136 We also obtained estimates of net diversification rates with other methods to account  
137 for intra-generic variation in seed size and test the robustness of our findings. The  
138 first method used a moment estimator that assumed diversification rates were constant  
139 over time within genera that had a known crown age and number of species [20].  
140 Monophyletic genera were then selected from a phylogenetic tree containing 8448  
141 species present in our initial seed mass dataset so that they each contained  $\geq 4$  species  
142 with seed size data and more than 30% of their described species, thereby ensuring  
143 that the minimum probability of recovering the correct crown age node of any genus  
144 was 70% (see Methods). A rate of seed size evolution was then estimated for the 70  
145 resulting genera by fitting a Brownian Motion (BM) model of trait evolution.  
146 Mirroring the BAMM analysis, diversification rates were strongly correlated with the  
147 rate of seed size evolution (PGLS slope = 0.157, p-value = 0.004; df = 69), and  
148 weakly negatively correlated with mean genus seed size (PGLS slope = -0.064, p-

149 value = 0.039; df = 69). Our results were similar when we did not limit the analysis  
150 based on available seed size data (PGLS slope = -0.103, p-value = 0.004, df = 127; no  
151 analysis was performed for trait evolution with these criteria because of considerable  
152 missing data).

153

154 The second method that we used to account for intra-generic variation involved  
155 estimating macroevolutionary dynamics and phenotypic evolution across sets of  
156 clades in our species-level tree that were defined at different timescales. A series of  
157 ten, 2 million year-wide time slices from the present up to 20 million years ago was  
158 used to identify the most inclusive monophyletic clades of  $\geq 4$  species. The minimum  
159 intra-clade sampling fraction was set at 30% as above. For each resulting clade in  
160 each time interval, diversification rates and seed size evolution were estimated as in  
161 our previous non-BAMM analyses. We also fitted a series of time-dependent  
162 diversification models to each clade with RPANDA, which uses a maximum  
163 likelihood approach to estimate speciation and extinction and allows for incomplete  
164 taxon sampling [21]. By measuring the correlation of macroevolutionary rates and  
165 morphological rates across sets of similarly aged clades we effectively eliminated any  
166 spurious correlations caused by both rates being positively correlated with time.  
167 Again, we found a positive correlation between the rate of seed size evolution and  
168 speciation rates that was consistent across time slices (Fig. 3a, Fig. S3a). As expected  
169 given the weak association between seed size and speciation found in our other  
170 analyses, a significant negative correlation was only recovered in some of the  
171 analysed time slices (Fig 3b, Fig. S3b).

172

173 **Discussion**

174 Our study supports the ideas that variation in seed mass and, particularly, its rate of  
175 evolution can help explain disparity in diversification across the angiosperm  
176 phylogeny by playing a central role in plant life history. As we show with our clade-  
177 based analysis, our results are repeatable across many methodologies, varying  
178 timescales and do not ascribe to a particular taxonomic category (Figs 2, 3). We also  
179 showed that the effect of intra-generic variation in seed mass in the BAMM analysis  
180 was negligible (S1 Appendix).

181

182 The robust association of high rates of phenotypic change with lineage diversification  
183 has recently been observed in other taxonomic groups [9,12], but never across the  
184 whole of the angiosperm ToL as we find here. Accelerated morphological evolution  
185 may allow radiating lineages to occupy more complex adaptive landscapes [22].  
186 Similarly, species with greater rate of change in their seed mass (i.e., higher  
187 evolvability) could shift between adaptive peaks or develop reproductive barriers  
188 more rapidly. Alternatively, the theory of punctuated equilibria [23], whereby  
189 morphological changes can arise from the speciation process, might also explain the  
190 connection of phenotypic evolution with species divergence. However, current  
191 methods do not allow us to distinguish whether speciation is responding to  
192 morphological change or vice versa when reconstructing 250 million years of  
193 evolutionary history [9].

194

195 Seed mass itself will also covary with dispersal ability and environmental tolerance in  
196 ways that can change speciation and extinction. For example, we found that smaller-  
197 seeded genera had faster speciation rates. This may be because smaller-seeded genera  
198 generally disperse over larger distances [24], which can promote speciation by



199 creating isolated populations [25]. However, the relationship between dispersal and  
200 speciation is highly context dependent. The permeability of a landscape to dispersal  
201 determines the values of dispersal that may promote species divergence [26]. The  
202 weak correlation that we observed between seed size and diversification might  
203 therefore reflect contradicting patterns of different strength operating at different  
204 clades in the angiosperm phylogeny. Dispersal syndromes may also modify the effect  
205 of seed size on speciation. For instance, species with larger seeds are generally  
206 associated with biotic dispersal that distributes seeds over greater distances than wind  
207 or gravity dispersal [5]. However, broad-scale predictions for the effects of dispersal  
208 syndromes on diversification may be inaccurate, since the former depend on  
209 landscape connectivity [8] and can sometimes be inconsistent, e.g. a wind-dispersed  
210 seed might be transported by an animal. We also found that smaller-seeded genera had  
211 higher rates of extinction, possibly due to smaller nutritional reserves that constrain  
212 establishment, environmental tolerance and access to limiting resources [27]. Detailed  
213 contextual data will be necessary to expand upon the mechanisms underlying our  
214 findings in specific regions and clades.

215

216 Although seed mass is associated with other traits that can affect diversification, there  
217 is little evidence that these better explain our observed correlations or that seed size is  
218 a mere proxy for one of these other traits. For example, genome size positively  
219 correlates with seed mass [28], and faster rates of genome size evolution have been  
220 linked to increased speciation in angiosperms [29]. Shorter, smaller-seeded plants also  
221 tend to have faster life cycles, which may accelerate mutation rates [30] and promote  
222 diversification [31]. By comparing the effects of genome size and life cycle across a  
223 subset of >900 genera in our dataset, we found that only the distinction between

224 strictly annual versus perennial genera influenced macroevolutionary dynamics in a  
225 similar way as seed size (S1 Appendix, Fig. S4). But unlike other traits [29], both  
226 absolute seed size as well as its rate of change were correlated with speciation and  
227 extinction. Thus, although other traits surely influence diversification [32], we argue  
228 that our results generally reflect the role of seed size as a trait that integrates across  
229 multiple aspects of life history characteristics in ways that can predictably influence  
230 plant macroevolutionary dynamics (Fig. S5).

231

232 The approach applied here can help to unravel the processes responsible for  
233 generating large-scale asymmetries in biodiversity. It also offers the potential to test  
234 how widely-varying traits and their rate of morphological evolution influence other  
235 aspects of the evolution and adaptation of flowering plants (e.g. [16]). Clade-specific  
236 exceptions arising from local interactions with non-focal traits [33] and specific  
237 spatio-temporal contexts will undoubtedly interact with broad-scale  
238 macroevolutionary patterns and may modulate the effects of seed mass on  
239 diversification. Regardless, our results show that seed size and its rate of evolution  
240 correlate with speciation and extinction across the flowering plants. This finding may  
241 help to explain why some clades are much more species-rich than others and points to  
242 a key role of rapid morphological evolution in generating greater levels of diversity.

243

## 244 **Materials and methods**

### 245 *Seed mass and phylogenetic dataset*

246 Seed mass data for 31,932 species were obtained from the Royal Botanic Gardens  
247 Kew Seed Information Database [17]. Species names were standardised with The  
248 Plant List (TPL) nomenclature [2] and cleaned using the *Taxonstand* R package [34].

249 Further processing at the genus-level was performed with the *taxonlookup* R package  
250 [35], which is a complete genus-family-order mapping for vascular plants that draws  
251 from TPL, the Angiosperm Phylogeny website [36] and a higher-level manually-  
252 curated taxonomic lookup [16]. Mean seed mass values were subsequently calculated  
253 for a total of 4763 genera.

254

255 We used the most comprehensive phylogenetic tree for land plants [16,37] that  
256 comprises 31,389 species. Taxonomic information for our phylogenetic tree was run  
257 through *Taxonstand* and *taxonlookup* as described above to make it as comparable as  
258 possible to the seed mass dataset. Monophyly of the genera in the tree was assessed  
259 using the *Monophy* package [38]. The initial estimate was 16%, but we removed taxa  
260 classified as outliers by *Monophy* (i.e., taxa that lay outside of an established “core  
261 clade” for each genus) and this resulted in only 8% of the genera not being  
262 monophyletic. The *Phyndr* [35] package was then used to generate a genus-level tree  
263 with as much overlap as possible between the phylogeny and the trait data. The final  
264 genus-level phylogenetic tree included representatives from 303 plant families (Fig.  
265 S6). We also obtained a species-level tree with 8448 representatives from the initial  
266 phylogenetic tree that were also present in the Kew Seed Information Database.

267

### 268 *Diversification and phenotypic evolution analyses*

269 First, speciation, extinction and net diversification rates and rates of seed size  
270 evolution were estimated separately on the genus-level phylogeny using BAMM  
271 version 2.5.0 [18]. BAMM models shifts in macroevolutionary regimes across a  
272 phylogenetic tree using reversible-jump Markov chain Monte Carlo (rjMCMC)  
273 sampling. Initial prior settings were calculated with the *setBAMMpriors* function in

274 *BAMMtools* [39], and the *expectedNumberOfShifts* parameter was set at 25 for both  
275 the speciation/extinction and trait evolution analyses, respectively. We incorporated  
276 non-random incomplete sampling information following BAMM protocols by  
277 calculating the proportion of genera sampled inside each family and estimated the  
278 backbone sampling as the overall proportion of sampled genera. *Taxonlookup* was  
279 used as a reference for these calculations. All BAMM analyses were run for 50  
280 million generations. We verified convergence by plotting chain traces and ensuring  
281 that the effective sample sizes of all relevant parameters exceeded 200. The first 10  
282 million generations were discarded as burn-in. The *plotPrior* function in *BAMMtools*  
283 was used to check the difference between model priors and posteriors. We also  
284 analysed BAMM prior sensitivity by re-running both the diversification and the trait  
285 evolution analyses with different settings for the *expectedNumberOfShifts* parameter  
286 of either 10, 25, 50 or 100 (Fig. S1).

287

288 Second, estimates of net diversification rates were obtained for a curated set of  
289 angiosperm genera using the species-level phylogeny. Only monophyletic genera with  
290 four or more species in the tree were considered for further analysis. A minimum  
291 threshold value for genus specific sampling fraction was set at 0.3. This ensured that  
292 the minimum probability of recovering the true root node of any genera was 0.7  
293 (“crown sampling probability”, following [40,41]). Crown ages for the selected  
294 genera were then calculated and used to estimate net diversification rates using the  
295 method-of-moments estimator [20]. The total number of species in each genus was  
296 obtained from *taxonlookup*. Following standard practice, we assumed three values of  
297 relative extinction fraction,  $\epsilon = 0, 0.5$  and  $0.9$ . Different values did not affect our  
298 conclusions; therefore we present the results of the intermediate extinction fraction ( $\epsilon$

299 = 0.5). The rate of seed size evolution was estimated with by fitting a Brownian  
300 Motion (BM) model of evolution to the seed size data within each genus using  
301 *fitContinuous* from the package *geiger* [42].

302

303 Finally, we obtained clade-based measures of diversification and seed size evolution  
304 across the species-level tree. Clade-specific sampling fractions were calculated by  
305 weighting the genus-specific sampling fractions (i.e., the number of congeneric  
306 species in the 8448 species tree divided by the total number of described species for  
307 that genus) by the number of species from each genus present in the clade. These  
308 weighted sampling fractions were used to estimate the total clade species richness. A  
309 minimum threshold of 0.3 was used for the clade-specific sampling fraction, again  
310 ensuring that the crown sampling probability for each clade was at least 0.7 (the  
311 actual median clade crown sampling probabilities for the time slices ranged between  
312 0.84 and 0.95). We estimated net diversification rates with the method-of-moments  
313 estimator as described above. We also used RPANDA to fit a series diversification  
314 models that estimated time-dependent rates to each clade. We fitted six different  
315 models of diversification: (i) pure birth model with constant  $\lambda$  (speciation rate); (ii)  
316 pure birth model with exponential  $\lambda$ ; (iii) birth-death model with constant  $\lambda$  and  $\mu$   
317 (extinction); (iv) birth-death model with constant  $\lambda$  and exponential  $\mu$ ; (v) birth-death  
318 model with exponential  $\lambda$  and constant  $\mu$ ; and (vi) birth-death model with exponential  
319  $\lambda$  and exponential  $\mu$ . We then used AIC-based model selection to select the best fitting  
320 model and obtain the corresponding macroevolutionary parameters. Additionally, to  
321 account for possible biases when analysing clades with many non-congeneric species,  
322 we confirmed the results of our clade-based analysis but only considered clades that  
323 only contained congeneric species (Fig. S7).

324

325 *Correlation of diversification and trait evolution*

326 All rate variables were log-transformed for the correlation analyses. We used  
327 STRAPP to test for multiple associations between BAMM-estimated  
328 macroevolutionary dynamics and each of seed mass (using genus mean values as  
329 character states) and seed mass rate of evolution (using seed mass evolutionary rates  
330 at the genus-level tips of the phylogeny as character states). STRAPP compares the  
331 correlation between a focal trait and a macroevolutionary parameter ( $\lambda$ ,  $\mu$  or  $r$ ) to a  
332 null distribution of correlations. The null correlations are generated by permuting the  
333 evolutionary rates in the tips of the phylogenetic tree while maintaining the location  
334 of rate shift events in the phylogeny. In each case, we calculated the absolute  
335 difference between the observed correlation of the macroevolutionary rate and the  
336 trait state and the null correlation obtained by the structured permutations across 5000  
337 samples from the BAMM posterior. The reported p-value was the proportion of  
338 replicates where the null correlation coefficient was greater than the observed  
339 correlation. We found a low type I error associated with our STRAPP correlation  
340 analysis (p-value = 0.11, Fig. S8).

341

342 For both the curated genera dataset and the clade based analyses, we estimated the  
343 relationship between speciation rates with seed size rate of evolution and mean genus  
344 seed size with phylogenetic generalised least square (PGLS) as implemented in the R  
345 package *caper* [43] (Fig. S9, Fig. S10). Similar results as presented in the main text  
346 were obtained when analysing net diversification instead of speciation rates (Fig.  
347 S11). Finally, we similarly analysed the correlation between speciation and each of  
348 seed size and its rate of change, this time selecting only clades consisting of

349 congeneric species. Again, this analysis resulted in a similar pattern as the one  
350 presented in the main text (Fig. S7).

351

### 352 *Code availability*

353 Scripts used to carry out the analysis described in the paper and generate the figures  
354 will be deposited in Github upon acceptance.

355

### 356 **Acknowledgments**

357 We thank D. A. Coomes, A. J. Helmstetter, T. Jucker and W. G. Lee for useful  
358 comments that helped improve the manuscript; and V. Soria-Carrasco for help with  
359 analyses. J.I. and A.J.T. thank the Gatsby Charitable Foundation, Wellcome Trust and  
360 Newton Trust for funding. E.F.M was funded by the BBSRC DTP at the University of  
361 Cambridge.

362

### 363 **Author contributions**

364 J.I and A.S.T.P conceived the study. J.I. and E.F.M. performed the analysis. J.I. and  
365 A.J.T interpreted the analysis and wrote the manuscript. All authors edited the  
366 manuscript.

367

368

### 369 **References**

- 370 1. Crane PR, Friis EM, Pedersen KR. The origin and early diversification of  
371 angiosperms. *Nature*. 1995;374: 27–33. doi:10.1038/374027a0  
372 2. The Plant List. Version 1.1 [Internet]. 2013 [cited 20 Jun 2003]. Available:  
373 <http://www.theplantlist.org/>  
374 3. Davies T, Barraclough T. The diversification of flowering plants through time  
375 and space: Key innovations, climate and chance. *Reconstructing the Tree of*  
376 *Life: Taxonomy and Systematics of Species Rich Taxa*. 2007. pp. 149–163.  
377 doi:DOI: 10.1201/9781420009538.ch10

- 378 4. Moles AT, Ackerly DD, Webb CO, Tweddle JC, Dickie JB, Westoby M. A brief  
379 history of seed size. *Science* (80- ). 2005;307: 576–580.  
380 doi:10.1126/science.1104863
- 381 5. Moles A, Leishman M. The seedling as part of a plant’s life history strategy. In:  
382 Leck MA, Parker VT, Simpson RL, editors. *Seedling ecology and evolution*.  
383 Cambridge: Cambridge University Press; 2008. pp. 215–235.
- 384 6. Salguero-Gómez R, Jones OR, Jongejans E, Blomberg SP, Hodgson DJ,  
385 Mbeau-Ache C, et al. Fast-slow continuum and reproductive strategies  
386 structure plant life-history variation worldwide. *Proc Natl Acad Sci U S A*.  
387 2016;113: 230–5. doi:10.1073/pnas.1506215112
- 388 7. Kostikova A, Salamin N, Pearman PB. The role of climatic tolerances and seed  
389 traits in reduced extinction rates of temperate polygonaceae. *Evolution* (N Y).  
390 2014;68: 1856–1870. doi:10.1111/evo.12400
- 391 8. Givnish TJ. Ecology of plant speciation. *Taxon*. 2010;59: 1326–1366.
- 392 9. Rabosky DL, Santini F, Eastman J, Smith SA, Sidlauskas B, Chang J, et al.  
393 Rates of speciation and morphological evolution are correlated across the  
394 largest vertebrate radiation. *Nat Commun*. Nature Publishing Group; 2013;4:  
395 1958. doi:10.1038/ncomms2958
- 396 10. Coyne JA, Orr HA. *Speciation*. Sinauer Associates; 2004.
- 397 11. Adams DC, Berns CM, Kozak KH, Wiens JJ. Are rates of species  
398 diversification correlated with rates of morphological evolution? *Proc R Soc B*  
399 *Biol Sci*. 2009;276: 2729–38. doi:10.1098/rspb.2009.0543
- 400 12. Price SL, Etienne RS, Powell S. Tightly congruent bursts of lineage and  
401 phenotypic diversification identified in a continental ant radiation. *Evolution*.  
402 2016; doi:10.1111/evo.12894
- 403 13. Pigliucci M. Is evolvability evolvable? *Nat Rev Genet*. Nature Publishing  
404 Group; 2008;9: 75–82. doi:10.1038/nrg2278
- 405 14. Ricklefs RE, Renner SS. Species richness within families of flowering plants.  
406 *Evolution* (N Y). [Society for the Study of Evolution, Wiley]; 1994;48: 1619–  
407 1636. doi:10.2307/2410252
- 408 15. Rees M, Westoby M. Game-theoretical evolution of seed mass in multi-species  
409 ecological models. *Oikos*. 1997;78: 116–126. doi:10.2307/3545807
- 410 16. Zanne AE, Tank DC, Cornwell WK, Eastman JM, Smith SA, FitzJohn RG, et  
411 al. Three keys to the radiation of angiosperms into freezing environments.  
412 *Nature*. 2014;506: 89–92. doi:10.1038/nature12872
- 413 17. Kew Seed Information Database. In: Royal Botanic Gardens Kew [Internet].  
414 2016 [cited 1 Mar 2016]. Available: <http://data.kew.org/sid/>
- 415 18. Rabosky DL. Automatic detection of key innovations, rate shifts, and diversity-  
416 dependence on phylogenetic trees. *PLoS One*. Public Library of Science;  
417 2014;9: e89543. doi:10.1371/journal.pone.0089543
- 418 19. Rabosky DL, Huang H. A robust semi-parametric test for detecting trait-  
419 dependent diversification. *Syst Biol*. Oxford University Press; 2016;65: 181–  
420 93. doi:10.1093/sysbio/syv066
- 421 20. Magallón S, Sanderson MJ. Absolute diversification rates in angiosperm  
422 clades. *Evolution* (N Y). 2001;55: 1762–1780. doi:10.1111/j.0014-  
423 3820.2001.tb00826.x
- 424 21. Morlon H, Lewitus E, Condamine FL, Manceau M, Clavel J, Drury J.  
425 RPANDA: An R package for macroevolutionary analyses on phylogenetic  
426 trees. Fitzjohn R, editor. *Methods Ecol Evol*. 2016;7: 589–597.  
427 doi:10.1111/2041-210X.12526



- 428 22. Lovette IJ, Bermingham E, Ricklefs RE. Clade-specific morphological  
429 diversification and adaptive radiation in Hawaiian songbirds. *Proc Biol Sci.*  
430 2002;269: 37–42. doi:10.1098/rspb.2001.1789
- 431 23. Eldredge N, Gould SJ. Punctuated equilibria: an alternative to phyletic  
432 gradualism. In: Schopf T, editor. *Models in Paleobiology*. San Francisco:  
433 Freeman Cooper; 1972. pp. 82–115.
- 434 24. Coomes DA, Grubb PJ. Colonization, tolerance, competition and seed-size  
435 variation within functional groups. *Trends Ecol Evol.* 2003;18: 283–291.  
436 doi:10.1016/S0169-5347(03)00072-7
- 437 25. Kisel Y, Barraclough TG. Speciation has a spatial scale that depends on levels  
438 of gene flow. *Am Nat.* 2010;175: 316–34. doi:10.1086/650369
- 439 26. Claramunt S, Derryberry EP, Remsen J V, Brumfield RT. High dispersal ability  
440 inhibits speciation in a continental radiation of passerine birds. *Proc Biol Sci.*  
441 2012;279: 1567–74. doi:10.1098/rspb.2011.1922
- 442 27. Leishman MR, Wright IJ, Moles AT, Westoby M. The evolutionary ecology of  
443 seed size. *The Ecology of Regeneration in Plant Communities*. 2000. pp. 31–  
444 58.
- 445 28. Beaulieu JM, Moles AT, Leitch IJ, Bennett MD, Dickie JB, Knight CA.  
446 Correlated evolution of genome size and seed mass. *New Phytol.* 2007;173:  
447 422–37. doi:10.1111/j.1469-8137.2006.01919.x
- 448 29. Puttick MN, Clark J, Donoghue PCJ. Size is not everything: rates of genome  
449 size evolution, not C-value, correlate with speciation in angiosperms. *Proc Biol*  
450 *Sci.* 2015;282: 20152289-. doi:10.1098/rspb.2015.2289
- 451 30. Lanfear R, Ho SYW, Love D, Bromham L. Mutation rate is linked to  
452 diversification in birds. *Proc Natl Acad Sci U S A.* 2010;107: 20423–8.  
453 doi:10.1073/pnas.1007888107
- 454 31. Lanfear R, Ho SYW, Jonathan Davies T, Moles AT, Aarssen L, Swenson NG, et  
455 al. Taller plants have lower rates of molecular evolution. *Nat Commun. Nature*  
456 *Publishing Group, a division of Macmillan Publishers Limited. All Rights*  
457 *Reserved.*; 2013;4: 1879. doi:10.1038/ncomms2836
- 458 32. Beaulieu JM, O’Meara BC. Detecting hidden diversification shifts in models of  
459 trait-dependent speciation and extinction. *Syst Biol.* 2016; syw022-.  
460 doi:10.1093/sysbio/syw022
- 461 33. Donoghue MJ, Sanderson MJ. Confluence, synnovation, and depauperons in  
462 plant diversification. *New Phytol.* 2015;207: 260–274. doi:10.1111/nph.13367
- 463 34. Cayuela L, Granzow-de la Cerda Í, Albuquerque FS, Golicher DJ. taxonstand:  
464 An r package for species names standardisation in vegetation databases.  
465 *Methods Ecol Evol.* 2012;3: 1078–1083. doi:10.1111/j.2041-  
466 210X.2012.00232.x
- 467 35. Pennell MW, FitzJohn RG, Cornwell WK. A simple approach for maximizing  
468 the overlap of phylogenetic and comparative data. *Methods Ecol Evol.* 2015;  
469 n/a-n/a. doi:10.1111/2041-210X.12517
- 470 36. Stevens P. Angiosperm Phylogeny website. In: *Angiosperm Phylogeny*  
471 *Website. Version 12 [Internet]. 2012. Available:*  
472 <http://www.mobot.org/MOBOT/research/APweb/>
- 473 37. Qian H, Jin Y. An updated megaphylogeny of plants, a tool for generating plant  
474 phylogenies and an analysis of phylogenetic community structure. *J Plant Ecol.*  
475 2015; rtv047. doi:10.1093/jpe/rtv047
- 476 38. Schwery O, O’Meara BC. MonoPhy: A simple R package to find and visualize  
477 monophyly issues. *PeerJ Inc.*; 2015; doi:10.7287/peerj.preprints.1600v1

- 478 39. Rabosky DL, Grundler M, Anderson C, Title P, Shi JJ, Brown JW, et al.  
479 BAMMtools: an R package for the analysis of evolutionary dynamics on  
480 phylogenetic trees. Kembel S, editor. *Methods Ecol Evol.* 2014;5: 701–707.  
481 doi:10.1111/2041-210X.12199
- 482 40. Sanderson MJ. How many taxa must be sampled to identify the root node of a  
483 large clade? *Syst Biol.* Oxford University Press; 1996;45: 168–173.  
484 doi:10.2307/2413613
- 485 41. Rabosky DL. Challenges in the estimation of extinction from molecular  
486 phylogenies: A response to Beaulieu and O’Meara. *Evolution.* 2016;70: 218–  
487 28. doi:10.1111/evo.12820
- 488 42. Pennell MW, Eastman JM, Slater GJ, Brown JW, Uyeda JC, Fitzjohn RG, et al.  
489 Geiger v2.0: An expanded suite of methods for fitting macroevolutionary  
490 models to phylogenetic trees. *Bioinformatics.* Oxford University Press;  
491 2014;30: 2216–2218. doi:10.1093/bioinformatics/btu181
- 492 43. Orme D. The caper package: comparative analysis of phylogenetics and  
493 evolution in R. R Packag version. 2013;5.
- 494 44. Bennett M, Leitch IJ. Plant DNA C-values database (release 6.0, Dec 2012)  
495 [Internet]. 2012. Available: <http://www.kew.org/cvalues/>  
496  
497

498

499

500

501

502

503

504

505

506

507

508

509

510

511

512

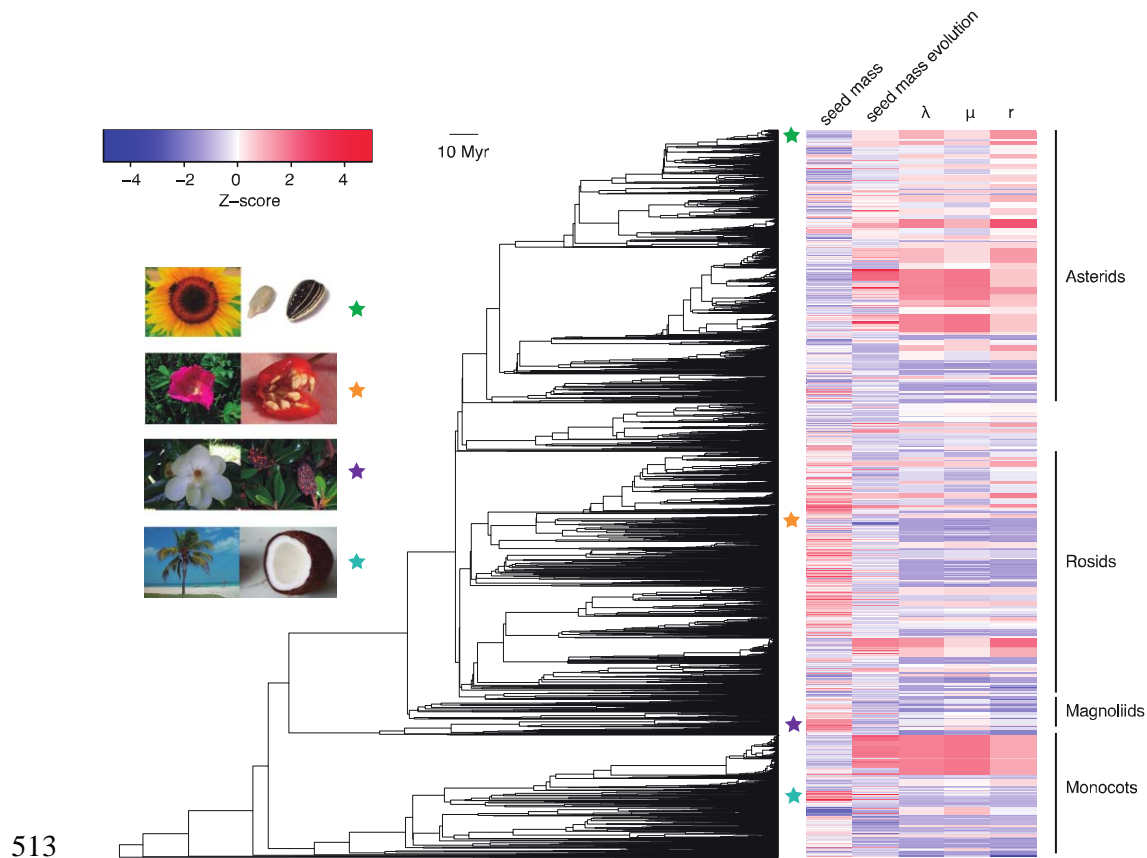

514 **Figure 1. Seed mass and macroevolutionary rates estimated with BAMM across**  
515 **the angiosperm tree of life.** Phylogenetic tree of 4105 genera of plants with seed  
516 mass, rate of seed mass change, and speciation ( $\lambda$ ), extinction ( $\mu$ ) and net  
517 diversification ( $r$ ) rates estimated by BAMM. Seed mass and rate data were  
518 standardised to Z-scores so that variation could be directly compared.

519  
520  
521  
522  
523  
524  
525  
526  
527  
528  
529  
530  
531  
532  
533

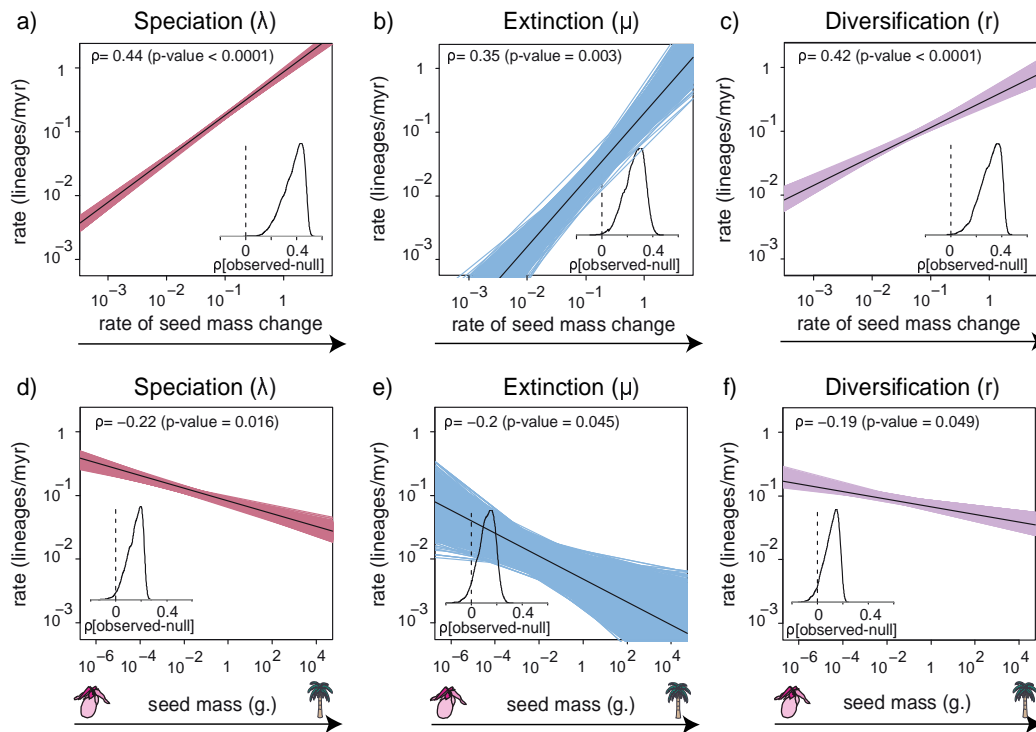

534

535

536

**Figure 2. Seed mass and seed mass rate of evolution correlate with**

537 **macroevolutionary dynamics estimated with BMM.** Spearman correlations were

538 calculated between speciation ( $\lambda$ ), extinction ( $\mu$ ), and net diversification ( $r$ ) and each

539 of a) rate of seed mass change and b) seed mass. Coloured lines are correlations for

540 one sample of the BMM posterior distribution, bold line is the median. The insets

541 show the density plots of the absolute difference between the observed and null

542 correlation calculated across 5000 structured permutations of the evolutionary rates

543 on the phylogenetic tree (myr = million years).

544

545

546

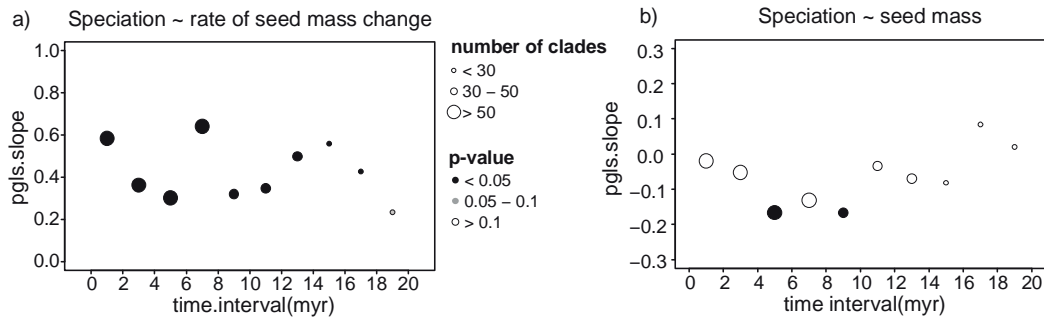

547  
548

549 **Figure 3. Seed mass and seed mass rate of evolution correlate with speciation in**

550 **the clade-based analysis.** Correlation of (a) rate of seed mass evolution and (b) seed

551 mass with speciation rate ( $\lambda$ ) estimated using RPANDA in the clade-based analysis.

552 The strength of correlations is shown as PGLS slopes and were calculated using mean

553 clade-level seed mass across 10 time slices in the species-level phylogenetic tree. The

554 size of the circles represents the number of clades in each time slice while the colour

555 indicates the significance of the slope. A detailed representation of the results in each

556 time slice is given in figures S9 and S10.

557

558

559

560

561

562

563

564

565

566

567

568

569

570

571

572

573

574

575

576

577

578

579

580 **Supporting Information captions**

581

582 **Fig. S1.** Prior and posterior distribution of the number of rate shifts in BAMM for a)  
583 the speciation/extinction and b) phenotypic evolution analyses for  
584 *expectedNumberOfShifts* = 10, 25, 50 and 100. The analyses in the main text were  
585 carried out with *expectedNumberOfShifts* = 25 for both speciation/extinction and  
586 phenotypic evolution analyses.

587

588 **Fig. S2.** Phylogenetic tree of 4105 angiosperm genera with branches scaled by  
589 diversification rate as determined by BAMM. The colours of the branches indicate the  
590 rate of seed mass evolution, also estimated with BAMM.

591

592 **Fig. S3.** Seed mass and its rate of evolution are associated with speciation in the  
593 clade-based analyses. (a) PGLS slope of the relationship between speciation rate ( $\lambda$ )  
594 from the method-of-moments estimator and the rate of seed mass evolution across  
595 10 time slices in the species level phylogenetic tree. Circles are scaled to the number  
596 of clades in each time slice while colour indicates the significance of the slope. (b)  
597 PGLS slope of the relationship between speciation rate and mean clade seed mass.  
598 For a detailed representation of the results in each time slice, see figure S12 and S13.

599

600 **Fig. S4.** STRAPP correlations of diversification and phenotypic traits for 938  
601 angiosperm genera. The distribution of the absolute difference in the observed  
602 correlation minus the null correlation is plotted for each trait. The coloured dotted  
603 lines indicate the mean of that distribution, and the black dotted line indicates 0; a  
604 distribution with mean = 0 would show no association between a focal trait and

605 speciation. STRAPP correlation of seed mass (shown in blue), C-value (shown in red)  
606 and life cycle (shown in green) with a) speciation rate ( $\lambda$ ), b) extinction rate ( $\mu$ ), and  
607 c) net diversification rate ( $r$ ).

608

609 **Fig. S5.** Proposed effects of seed mass and other life history traits on diversification  
610 (solid lines). Dashed lines indicate correlations between life history traits. Numbers  
611 indicate reference where the link is proposed.

612

613 **Fig. S6.** Phylogenetic tree of 303 angiosperm families with representatives in this  
614 study. The red bars indicate the levels of sampling for each family.

615

616 **Figure S7.** Correlation of speciation with seed mass and seed mass rate of evolution  
617 in the clade-based analysis only considering congeneric species. (a) PGLS slope of  
618 the relationship of speciation rate - estimated with the method-of-moments estimator -  
619 with mean clade seed mass across 10 time slices in the species level phylogenetic tree.  
620 The size of the circles represents the number of clades in each time slice while the  
621 colour indicates the significance of the slope. (b) PGLS slope of the relationship of  
622 speciation rate and the rate of seed mass evolution.

623

624 **Fig. S8.** Type I error analysis. We estimated the type I error rate of our analysis by  
625 simulating neutral traits on the angiosperm phylogenetic tree. We performed 1000  
626 simulations and then ran 1000 STRAPP tests with each simulated dataset. We  
627 estimated the corresponding p-values for the association between traits and  
628 diversification and calculated the type I error as the proportion of datasets where a  
629 significant association (p-value < 0.05) was detected.

630

631 **Fig. S9.** Correlations between clade rate of seed size evolution and speciation rate  
632 (estimated with RPANDA) across time slices from: (a) 0 to 2 million years (myr); (b)  
633 2 to 4 myr; (c) 4 to 6 myr; (d) 6 to 8 myr; (e) 8 to 10 myr; (f) 10 to 12 myr; (g) 12 to  
634 14 myr; (h) 14 to 16 myr; (i) 16 to 18 myr; and (j) 18 to 20 myr.

635

636 **Fig. S10.** Correlations between mean clade seed mass and speciation rate (estimated  
637 with RPANDA) across time slices from: (a) 0 to 2 million years (myr); (b) 2 to 4 myr;  
638 (c) 4 to 6 myr; (d) 6 to 8 myr; (e) 8 to 10 myr; (f) 10 to 12 myr; (g) 12 to 14 myr; (h)  
639 14 to 16 myr; (i) 16 to 18 myr; and (j) 18 to 20 myr.

640

641 **Figure S11.** Correlation of (a) rate of seed mass evolution and (b) seed mass with net  
642 diversification rate ( $r$ ) estimated using RPANDA in the clade-based analysis. The  
643 strength of correlations is shown as PGLS slopes and were calculated using mean  
644 clade-level seed mass across 10 time slices in the species-level phylogenetic tree. The  
645 size of the circles represents the number of clades in each time slice while the colour  
646 indicates the significance of the slope.

647

648 **Fig. S12.** Correlations between clade rate of seed size evolution and speciation rate  
649 (estimated with the method-of-moments estimator) across time slices from: (a) 0 to 2  
650 million years (myr); (b) 2 to 4 myr; (c) 4 to 6 myr; (d) 6 to 8 myr; (e) 8 to 10 myr; (f)  
651 10 to 12 myr; (g) 12 to 14 myr; (h) 14 to 16 myr; (i) 16 to 18 myr; and (j) 18 to 20  
652 myr.

653

654 **Fig. S13.** Correlations between mean clade seed mass and speciation rate (estimated



655 with the method-of-moments estimator) across time slices from: (a) 0 to 2 million  
656 years (myr); (b) 2 to 4 myr; (c) 4 to 6 myr; (d) 6 to 8 myr; (e) 8 to 10 myr; (f) 10 to 12  
657 myr; (g) 12 to 14 myr; (h) 14 to 16 myr; (i) 16 to 18 myr; and (j) 18 to 20 myr.

658

659 **Fig. S14.** Mean genus seed mass of strict annual ( $n = 106$ ) and perennial ( $n = 832$ )  
660 genera. No significant difference between the means of the two groups was found  
661 when phylogeny was accounted for (PGLS,  $F_{1,937} < 0.01$ ,  $p\text{-value} = 0.972$ ).

662

663 **Fig. S15.** Mean genus seed mass and coefficient of variation for 2613 angiosperm  
664 genera. The two variables were not significantly correlated (PGLS test,  $F_{1,131} = 0.67$ ,  
665  $p\text{-value} = 0.416$ ).

666

667 **Fig. S16.** Correlation of coefficient of variation in seed mass with macroevolutionary  
668 dynamics. STRAPP correlations with speciation ( $\lambda$ ), extinction ( $\mu$ ) and net  
669 diversification ( $r$ ) and the genus-level coefficient of variation in seed mass for 2613  
670 angiosperm genera (i.e. each with seed mass data for  $>1$  species in the Kew SID).  
671 Correlations and insets calculated as in Fig. 2.

672

673 **Table S1.** STRAPP correlations for 938 genera of angiosperms with seed mass,  
674 genome size (i.e., C-value) and life cycle data. Macroevolutionary parameters were  
675 obtained from an analysis with 4105 genera (see Main text).

676

677
